# Supplementary material
Source: ML conference proceedings conference paper supplement (https://proceedings.mlr.press/v70/panahi17a.html)
Supplement: Supplementary file [file panahi17a-supp.pdf]

# 1. Appendix

Here we present a more detailed proof of Theorem 1 and 2.

## 1.1. Proof of Theorem 1

We prove a more general result:

**Theorem 1.** Consider vectors  $x_i \in \mathbb{R}^m$  for  $i = 1, 2, \dots, n$  and their partitions  $V_1, V_2, \dots, V_K$  with sizes  $n_1, n_2, \dots, n_K$ . Take the SON optimization:

$$\min_{\{u_i \in \mathbb{R}^m\}} \frac{1}{2} \sum_{i=1}^n \|x_i - u_i\|_2^2 + \lambda \sum_{i \neq j} \|u_i - u_j\|_2 \quad (1)$$

and its associated centroid optimization:

$$\min_{\{v_\alpha \in \mathbb{R}^m\}} \frac{1}{2} \sum_{i=1}^K \|v_\alpha - c_\alpha\|_2^2 n_\alpha + \lambda \sum_{\alpha \neq \beta} n_\alpha n_\beta \|c_\alpha - c_\beta\|_2 \quad (2)$$

where

$$c_\alpha = \frac{\sum_{i \in V_\alpha} x_i}{n_\alpha}$$

1. Suppose that for every  $\alpha \in [K]$ ,

$$\frac{\max_{i,j \in V_\alpha} \|x_i - x_j\|}{n_\alpha} \leq \lambda.$$

Then,  $u_i = v_\alpha$  for  $i \in V_\alpha$  is a global solution of the SON clustering.

2. If all  $c_\alpha$ s are distinct and  $\frac{d}{2n\sqrt{K}} \geq \lambda$  where  $d = \min_{\alpha \neq \beta} \|c_\alpha - c_\beta\|$ , then all centroids  $v_\alpha$  are distinct.

3. If  $\max_{\alpha} \frac{\|c_\alpha - c\|}{n - n_\alpha} \geq \lambda$  where  $c = \sum_{i=1}^n x_i / n$ , then at least two centroids  $v_\alpha$  are distinct.

*Proof.* Notice that the solution of the centroid optimization satisfies

$$c_\alpha - v_\alpha = \lambda \sum_{\beta} n_\beta z_{\alpha,\beta}$$

where  $\|z_{\alpha,\beta}\| \leq 1$ ,  $z_{\alpha,\beta} = -z_{\beta,\alpha}$  and whenever  $v_\alpha \neq v_\beta$ , the relation  $z_{\alpha,\beta} = \frac{v_\alpha - v_\beta}{\|v_\alpha - v_\beta\|_2}$  holds. Now, for the solution  $u_i = v_\alpha$  for  $i \in V_\alpha$ , define

$$z'_{ij} = \begin{cases} z_{\alpha,\beta} & \alpha \neq \beta \\ \frac{x_i - x_j}{\lambda n_\alpha} & \alpha = \beta \end{cases},$$

where  $i \in V_\alpha, j \in V_\beta$ . It is easy to see that  $\|z'_{ij}\|_2 \leq 1$ ,  $z'_{ij} = -z'_{ji}$  and whenever  $u_i \neq u_j$ , we have that  $z'_{ij} = \frac{u_i - u_j}{\|u_i - u_j\|_2}$ . Further for each  $i$ ,

$$\lambda \sum_j z'_{i,j} = \lambda \sum_{\beta} z_{\alpha,\beta} n_\beta + \sum_{j \in V_\alpha} \frac{x_i - x_j}{n_\alpha}$$

$$= c_\alpha - v_\alpha + x_i - c_\alpha = x_i - v_\alpha = x_i - u_i$$

This shows that the local optimality conditions for the SON optimization holds and proves part a.

For part b, denote the solution of the centroid optimization by  $v_\alpha(\lambda)$  and notice that the solution of SON consists of distinct elements  $v_\alpha = c_\alpha$  and is continuous at  $\lambda = 0$ . Hence,  $v_\alpha$ s remain distinct in an interval  $\lambda \in [0, \lambda_1)$ . Take  $\lambda_0$  as the supremum of all possible  $\lambda_1$ s. Hence, the solution in  $\lambda \in [0, \lambda_0)$  contains distinct element and at  $\lambda = \lambda_0$  contains two equal elements (otherwise, one can extend  $[0, \lambda_0)$  to some  $[0, \lambda_0 + \epsilon)$ , which is against  $\lambda$  being supremum). Now, notice that for  $\lambda \in [0, \lambda_0)$  the objective function is smooth at the optimal point. Hence,  $v_\alpha(\lambda)$  is differentiable and satisfies

$$\delta = \left[ \frac{dv_\alpha}{d\lambda} \right]_{\alpha} = H^{-1} \frac{\partial g}{\partial \lambda} \quad (3)$$

where  $[\cdot]_{\alpha}$  and  $[\cdot]_{\alpha,\beta}$  denote block vectors and block matrices respectively. Moreover,  $H$  and  $g$  are the Hessian and the gradient of the objective function at the optimal point. In other words,

$$H = \left[ n_\alpha \delta_{\alpha,\beta} I + \frac{I \|v_\alpha - v_\beta\|_2^2 - (v_\alpha - v_\beta)(v_\alpha - v_\beta)^T}{\|v_\alpha - v_\beta\|_2^3} \lambda n_\alpha n_\beta \right]_{\alpha,\beta}$$

and

$$\frac{\partial g}{\partial \lambda} = \left[ \sum_{\beta} z_{\alpha,\beta} n_\alpha n_\beta \right]_{\alpha}$$

Hence,

$$\delta = \left[ \delta_{\alpha,\beta} I + \frac{I \|v_\alpha - v_\beta\|_2^2 - (v_\alpha - v_\beta)(v_\alpha - v_\beta)^T}{\|v_\alpha - v_\beta\|_2^3} \lambda n_\beta \right]_{\alpha,\beta}^{-1} \times \left[ \sum_{\beta} z_{\alpha,\beta} n_\beta \right]_{\alpha}$$

Simple calculations show that  $\|\delta\|_2 \leq n\sqrt{K}$ . Hence,

$$\left\| \frac{dv_\alpha}{d\lambda} \right\|_2 \leq \|\delta\|_2 \leq \sqrt{K}n$$

This yields for  $\lambda < \lambda_0$  to

$$\begin{aligned} \|v_\alpha(\lambda) - v_\beta(\lambda)\|_2 &= \left\| c_\alpha - c_\beta + \int_0^\lambda \left( \frac{dv_\alpha}{d\lambda} - \frac{dv_\beta}{d\lambda} \right) d\lambda \right\|_2 \\ &\geq \|c_\alpha - c_\beta\|_2 - \int_0^\lambda \left\| \frac{dv_\alpha}{d\lambda} - \frac{dv_\beta}{d\lambda} \right\|_2 d\lambda \end{aligned}$$

055  
056  
057  
058  
059  
060  
061  
062  
063  
064  
065  
066  
067  
068  
069  
070  
071  
072  
073  
074  
075  
076  
077  
078  
079  
080  
081  
082  
083  
084  
085  
086  
087  
088  
089  
090  
091  
092  
093  
094  
095  
096  
097  
098  
099  
100  
101  
102  
103  
104  
105  
106  
107  
108  
109

$$\geq d - 2n\lambda\sqrt{K}$$

Since at  $\lambda = \lambda_0$ , we have that  $v_\alpha = v_\beta$  for some  $\alpha \neq \beta$ , we get that  $d - 2n\lambda_0\sqrt{K} \leq 0$  or  $\lambda_0 \geq d/2n\sqrt{K}$ . this proves part b.

For part c, Take a value of  $\lambda$ , where  $v_1 = v_2 = \dots = v_K$ . It is simple to see that in this case  $v_\alpha = c$ . The optimality condition leads to

$$c - c_\alpha = \lambda \sum_{\beta \neq \alpha} z_{\alpha, \beta} n_\beta$$

Hence,  $\|c - c_\alpha\|_2 \leq \lambda(n - n_\alpha)$ . This proves part c.  $\square$

## 1.2. Proof of Theorem 2

Denote by  $\mathbf{U}_k$  a matrix where the  $i^{\text{th}}$  column is the value of  $u_i$  at the  $k^{\text{th}}$  iteration. Define

$$\psi_\mu(\mathbf{U}) = \mathcal{E}(\mathbf{U}_{k+1} \mid \mathbf{U}_k = \mathbf{U}, \mu_k = \mu), \quad (4)$$

which by simple manipulations leads to

$$\psi_\mu(\mathbf{U}) = \mathbf{U} + \frac{1}{\binom{n}{2}} \sum_{i < j} \left( \mathbf{L}_{ij}(\Pi_{ij}^{(\mu)}(u_i, u_j)) - \mathbf{L}_{ij}(u_i, u_j) \right)$$

where  $u_i$  denotes the  $i^{\text{th}}$  column of  $\mathbf{U}$  and  $\mathbf{L}_{ij}(x, y)$  is a matrix where the  $i^{\text{th}}$  column is  $x$ , the  $j^{\text{th}}$  column is  $y$  and the rest are zero. Also, denote

$$\begin{aligned} \sigma_\mu^2(\mathbf{U}) &= \text{Var}(\mathbf{U}_{k+1} \mid \mathbf{U}_k = \mathbf{U}, \mu_k = \mu) \\ &= \mathcal{E} \left( \|\mathbf{U}_{k+1}\|_2^2 \mid \mathbf{U}_k = \mathbf{U}, \mu_k = \mu \right) - \|\phi_\mu(\mathbf{U})\|_2^2 \end{aligned} \quad (5)$$

We prove a more detailed theorem:

**Theorem 2.** Starting from  $\bar{\mathbf{U}}_0 = \mathbf{U}_0$  (the initialization of the algorithm), define the characteristic sequence  $\{\bar{\mathbf{U}}_k\}_{k=0}^\infty$  by the following iteration:

$$\bar{\mathbf{U}}_{k+1} = \psi_{\mu_k}(\bar{\mathbf{U}}_k)$$

1. We have that

$$\Pr \left( \sup_k \|\mathbf{U}_k - \bar{\mathbf{U}}_k\|_F^2 + \sum_{l=k}^\infty \mu_l^2 > \lambda \right) \leq \frac{\sum_{k=0}^\infty \mu_k^2}{\lambda} \quad (6)$$

2. Define  $\tilde{\mathbf{U}}$  as the unique optimal solution of the SON optimization and suppose that  $\{\mu_k\}$  is a non-increasing sequence.

(a) There exists a positive sequence  $h_n = O(\frac{1}{n})$ , where  $n$  is the number of data points, such that

$$\begin{aligned} R(\bar{\mathbf{U}}_k, \mu_k) &\leq h_n \sum_{l=0}^{k-1} \mu_l^2 e^{-\frac{2}{n^2} \sum_{s=l+1}^{k-1} \frac{\mu_s}{1+\mu_s}} \\ &\quad + R(\mathbf{U}_0, \mu_0) e^{-\frac{2}{n^2} \sum_{s=0}^{k-1} \frac{\mu_s}{1+\mu_s}} \end{aligned} \quad (7)$$

where

$$R(\mathbf{U}, \mu) = \frac{1}{2} \|\tilde{\mathbf{U}} - \mathbf{U}\|_F^2 + \mu \left( \Phi(\mathbf{U}) - \Phi(\tilde{\mathbf{U}}) \right),$$

(b) There exists a universal constant  $a$  such that

$$\begin{aligned} \|\bar{\mathbf{U}}_k - \tilde{\mathbf{U}}\|_F^2 &\leq a \sum_{l=0}^{k-1} \mu_l^2 e^{-\frac{2}{n^2} \sum_{s=l+1}^{k-1} \mu_s} \\ &\quad + \|\mathbf{U}_0 - \tilde{\mathbf{U}}\|_F^2 e^{-\frac{2}{n^2} \sum_{s=0}^{k-1} \mu_s} \end{aligned}$$

3. Assume that  $\{\mu_k\}$  is non-increasing  $\sum_0^\infty \mu_k = \infty$  and  $\sum_0^\infty \mu_k^2 < \infty$ . Then, the sequence  $\mathbf{U}_k$  converges to  $\tilde{\mathbf{U}}$  in the following strong probability sense:

$$\forall \epsilon > 0; \lim_{k \rightarrow \infty} \Pr \left( \sup_{l \geq k} \|\mathbf{U}_l - \tilde{\mathbf{U}}\|_F^2 > \epsilon \right) = 0 \quad (8)$$

4. Take  $\mu_k = \frac{\mu_1}{k^\alpha}$  for  $k = 1, 2, \dots$  and  $\frac{2}{3} < \alpha < 1$ . For sufficiently small values of  $\epsilon > 0$  the relation

$$\|\mathbf{U}_l - \tilde{\mathbf{U}}\|_F^2 = O\left(\frac{1}{l^{3\alpha-2-\epsilon}}\right)$$

holds with probability 1.

*Proof.* Denote by  $\Omega_k$  the pair  $(i, j)$  which is selected in iteration  $k$  and  $\Omega^k = (\Omega_0, \Omega_1, \dots, \Omega_{k-1})$ . Also, denote  $\psi_\mu(\mathbf{U}, (i, j)) = \mathbf{U} + \mathbf{L}_{ij}(\Pi_{ij}^\mu(u_i, u_j)) - \mathbf{L}_{ij}(u_i, u_j)$ . Then, the iterations can be written as

$$\begin{aligned} \mathbf{U}_{k+1} &= \psi_{\mu_k}(\mathbf{U}_k, \Omega_k) \\ \bar{\mathbf{U}}_{k+1} &= \mathcal{E}(\psi_{\mu_k}(\bar{\mathbf{U}}_k, \Omega) \mid \bar{\mathbf{U}}_k) \end{aligned} \quad (9)$$

Define  $\Delta_k = \mathbf{U}_k - \bar{\mathbf{U}}_k$  and  $\eta_k = \psi_{\mu_k}(\bar{\mathbf{U}}_k, \Omega_k) - \mathcal{E}(\psi_{\mu_k}(\bar{\mathbf{U}}_k, \Omega) \mid \bar{\mathbf{U}}_k)$ . Also, denote  $\mathcal{U} = \{\bar{\mathbf{U}}_k\}_{k=0}^\infty$ . Notice that the sequence  $\{\eta_k\}_{k=0}^\infty$  consists of zero-mean independent elements. Subtracting the two iterations in (9) gives us:

$$\Delta_{k+1} = \psi_{\mu_k}(\mathbf{U}_k, \Omega_k) - \psi_{\mu_k}(\bar{\mathbf{U}}_k, \Omega_k) + \eta_k \quad (10)$$

It is simple to see that  $\Pi_{ij}^\mu(u_i, u_j)$  is a contraction map for any  $\mu, i, j$ . Then, it is simple to deduce that  $\psi_\mu(\mathbf{U}, \Omega)$  is

a contraction map for any  $\Omega$  and  $\mu$ . As a result, we obtain from (10) that

$$\mathcal{E} (\|\Delta_{k+1} - \eta_k\|_{\mathbb{F}}^2 \mid \Omega^k) \leq \|\Delta_k\|_{\mathbb{F}}^2,$$

which can also be written as

$$\begin{aligned} \mathcal{E} (\|\Delta_{k+1}\|_{\mathbb{F}}^2 \mid \Omega^k) &\leq \\ \|\Delta_k\|_{\mathbb{F}}^2 + 2\mathcal{E} (\langle \psi_{\mu_k}(\mathbf{U}_k, \Omega_k), \eta_k \rangle \mid \Omega^k) - \mathcal{E} \|\eta_k\|_{\mathbb{F}}^2 \end{aligned}$$

Now, it is simple to see that  $\|\psi_{\mu}(\mathbf{U}, \Omega) - \mathbf{U}\| \leq \sqrt{2}\mu$ . Furthermore,  $\mathbf{U}_k$  only depends on  $\Omega_0, \Omega_1, \dots, \Omega_{k-1}$ , while  $\eta_k$  is a function of  $\Omega_k$ . Hence,  $\mathbf{U}_k$  and  $\eta_k$  are independent and  $\mathcal{E}(\langle \mathbf{U}_k, \eta_k \rangle \mid \Omega^k) = \mathbf{0}$ . This leads to

$$\begin{aligned} \mathcal{E} (\|\Delta_{k+1}\|_{\mathbb{F}}^2 \mid \Omega^k) &\leq \\ \|\Delta_k\|_{\mathbb{F}}^2 + 2\mathcal{E} (\langle \psi_{\mu_k}(\mathbf{U}_k, \Omega_k) - \mathbf{U}_k, \eta_k \rangle \mid \Omega^k) - \mathcal{E} \|\eta_k\|_{\mathbb{F}}^2 \\ &\leq \|\Delta_k\|_{\mathbb{F}}^2 + 2\sqrt{2}\mu_k \sqrt{\mathcal{E}(\|\eta_k\|_2^2)} - \mathcal{E} \|\eta_k\|_{\mathbb{F}}^2 \end{aligned}$$

Notice that  $\mathcal{E}(\|\eta_l\|_2^2) = \sigma_{\mu_l}^2(\bar{\mathbf{U}}_l)$  and

$$\|\mathbf{U}_{k+1} - \mathbf{U}_k\|_2 = \|\psi_{\mu_k}(\mathbf{U}_k, \Omega_k) - \mathbf{U}_k\|_2 \leq \sqrt{2}\mu_k$$

which leads to

$$\sigma_{\mu}^2(\mathbf{U}) \leq 2\mu^2.$$

We conclude that

$$\mathcal{E} (\|\Delta_{k+1}\|_{\mathbb{F}}^2 \mid \Omega^k) \leq \|\Delta_k\|_{\mathbb{F}}^2 + 4\mu_k^2$$

Define  $s_k = \sum_{l=k}^{\infty} \mu_l^2$ . We observe that  $\|\Delta_k\|_{\mathbb{F}}^2 + s_k$  is a supermartingale. Hence, from the supermartingale version of the Doob's inequality we obtain that

$$\Pr \left( \sup_k \|\Delta_k\|_{\mathbb{F}}^2 + s_k > \lambda \right) \leq \frac{\mathcal{E} \|\Delta_0\|_{\mathbb{F}}^2 + s_0}{\lambda} = \frac{\sum_{k=0}^{\infty} \mu_k^2}{\lambda}$$

This proves part (1).

For part (2) from the definition of the proximal operator, there exists a vector  $\zeta \in \partial\phi_{\Omega}(\psi_{\mu}(\mathbf{U}, \Omega))$  such that  $\psi_{\mu}(\mathbf{U}, \Omega) = \mathbf{U} - \mu\zeta$ . We conclude that

$$\begin{aligned} \phi_{\Omega}(\tilde{\mathbf{U}}) - \phi_{\Omega}(\psi_{\mu}(\mathbf{U}, \Omega)) &\geq \\ \frac{1}{\mu} \langle \mathbf{U} - \psi_{\mu}(\mathbf{U}, \Omega), \tilde{\mathbf{U}} - \psi_{\mu}(\mathbf{U}, \Omega) \rangle &= \\ \frac{1}{2\mu} \left( \|\tilde{\mathbf{U}} - \psi_{\mu}(\mathbf{U}, \Omega)\|_{\mathbb{F}}^2 - \|\tilde{\mathbf{U}} - \mathbf{U}\|_{\mathbb{F}}^2 + \|\mathbf{U} - \psi_{\mu}(\mathbf{U}, \Omega)\|_{\mathbb{F}}^2 \right) \end{aligned}$$

Hence,

$$\begin{aligned} \Phi(\tilde{\mathbf{U}}) - \sum_{\Omega} \phi_{\Omega}(\psi_{\mu}(\mathbf{U}, \Omega)) \\ \geq \frac{n(n-1)}{4\mu} \left( \mathcal{E} \|\tilde{\mathbf{U}} - \psi_{\mu}(\mathbf{U}, \Omega)\|_{\mathbb{F}}^2 - \|\tilde{\mathbf{U}} - \mathbf{U}\|_{\mathbb{F}}^2 \right) \\ \geq \frac{n(n-1)}{4\mu} \left( \|\tilde{\mathbf{U}} - \psi_{\mu}(\mathbf{U})\|_{\mathbb{F}}^2 - \|\tilde{\mathbf{U}} - \mathbf{U}\|_{\mathbb{F}}^2 \right) \end{aligned} \quad (11)$$

where the last inequality is obtained by Jensen's inequality. Notice that

$$\begin{aligned} \sum_{\Omega} \phi_{\Omega}(\psi_{\mu}(\mathbf{U}, \Omega)) &= \\ \sum_{\Omega, \Omega'} \phi_{\Omega'}(\psi_{\mu}(\mathbf{U}, \Omega)) - \sum_{\Omega \neq \Omega'} \phi_{\Omega'}(\psi_{\mu}(\mathbf{U}, \Omega)) \\ &\geq \frac{n(n-1)}{2} \Phi(\psi_{\mu}(\mathbf{U})) - \sum_{\Omega \neq \Omega'} \phi_{\Omega'}(\psi_{\mu}(\mathbf{U}, \Omega)) \\ &= \Phi(\mathbf{U}) + \frac{n(n-1)}{2} (\Phi(\psi_{\mu}(\mathbf{U})) - \Phi(\mathbf{U})) \\ &\quad - \sum_{\Omega \neq \Omega'} (\phi_{\Omega'}(\psi_{\mu}(\mathbf{U}, \Omega)) - \phi_{\Omega'}(\mathbf{U})) \end{aligned}$$

Now, notice that  $\phi_{\Omega'}(\psi_{\mu}(\mathbf{U}, \Omega)) - \phi_{\Omega'}(\mathbf{U}) = 0$  when  $\Omega$  and  $\Omega'$  do not overlap. Also, there exists a constant  $a$  such that  $|\phi_{\Omega'}(\psi_{\mu}(\mathbf{U}, \Omega)) - \phi_{\Omega'}(\mathbf{U})| < a\mu$ . We conclude that

$$\begin{aligned} \sum_{\Omega} \phi_{\Omega}(\psi_{\mu}(\mathbf{U}, \Omega)) &\geq \\ \Phi(\mathbf{U}) + \frac{n(n-1)}{2} (\Phi(\psi_{\mu}(\mathbf{U})) - \Phi(\mathbf{U})) - 2(n-2)a\mu \end{aligned}$$

Define  $h_n = 8(n-2)a/n(n-1) = O(\frac{1}{n})$ . Replacing this result in (11) and performing straightforward calculations leads to

$$\begin{aligned} h_n \mu^2 &\geq \frac{2\mu}{n^2} \left( \Phi(\mathbf{U}) - \Phi(\tilde{\mathbf{U}}) \right) \\ &\quad + \mu (\Phi(\psi_{\mu}(\mathbf{U})) - \Phi(\mathbf{U})) \\ &\quad + \frac{1}{2} \left( \|\tilde{\mathbf{U}} - \psi_{\mu}(\mathbf{U})\|_{\mathbb{F}}^2 - \|\tilde{\mathbf{U}} - \mathbf{U}\|_{\mathbb{F}}^2 \right) \end{aligned} \quad (12)$$

Now, we introduce the recursion to (12). We introduce  $R_k = R(\bar{\mathbf{U}}_k, \mu_k)$  and use monotonicity of  $\mu_k$  to conclude that:

$$h_n \mu_k^2 \geq \frac{2\mu_k}{n^2} \left( \Phi(\bar{\mathbf{U}}_k) - \Phi(\tilde{\mathbf{U}}) \right) + R_{k+1} - R_k$$

Finally, we use the fact that  $\Phi(\cdot)$  is a 1-strongly convex function which leads to  $\Phi(\mathbf{U}) - \Phi(\tilde{\mathbf{U}}) \geq \frac{1}{2} \|\tilde{\mathbf{U}} - \mathbf{U}\|_{\mathbb{F}}^2$ , and conclude that

$$\Phi(\mathbf{U}) - \Phi(\tilde{\mathbf{U}}) \geq \frac{R(\mathbf{U}, \mu)}{1 + \mu}$$

This yields to

$$R_{k+1} - h_n \mu_k^2 \leq \left( 1 - \frac{2\mu_k}{n^2} \right) R_k \leq e^{-\frac{2\mu_k}{n^2}} R_k$$

where the last equality holds because  $1-x \leq e^{-x}$  for every positive  $x$ . It is now simple to see by induction that

$$R_k \leq h_n \sum_{l=0}^{k-1} \mu_l^2 e^{-\frac{2}{n^2} \sum_{s=l+1}^{k-1} \frac{\mu_s}{1+\mu_s}} + R_0 e^{-\frac{2}{n^2} \sum_{s=0}^{k-1} \frac{\mu_s}{1+\mu_s}} \quad (13)$$

which proves part (2a).

For part (2b), we observe from (11) that

$$\Phi(\tilde{\mathbf{U}}) - \Phi(\mathbf{U}) + \frac{n(n-1)}{2} a\mu \geq$$

$$\frac{n(n-1)}{4\mu} \left( \|\tilde{\mathbf{U}} - \psi_\mu(\mathbf{U})\|_{\mathbb{F}}^2 - \|\tilde{\mathbf{U}} - \mathbf{U}\|_{\mathbb{F}}^2 \right)$$

which with the similar argument to above leads to

$$\begin{aligned} \frac{1}{2} \|\bar{\mathbf{U}}_{k+1} - \tilde{\mathbf{U}}\|_{\mathbb{F}}^2 &\leq \left(1 - \frac{2\mu_k}{n^2}\right) \frac{1}{2} \|\bar{\mathbf{U}}_k - \tilde{\mathbf{U}}\|_{\mathbb{F}}^2 + a\mu_k^2 \\ &\leq \frac{1}{2} \|\bar{\mathbf{U}}_k - \tilde{\mathbf{U}}\|_{\mathbb{F}}^2 e^{-\frac{2\mu_k}{n^2}} + a\mu_k^2 \end{aligned}$$

We conclude part (2b).

For part (3,4), define  $\mathcal{U}^k = \{\bar{\mathbf{U}}_l^k\}_{l=0}^\infty$  as the sequence obtained by starting from  $\bar{\mathbf{U}}_0^k = \mathbf{U}_k$  and applying

$$\bar{\mathbf{U}}_{l+1}^k = \psi_{\mu_{l+k}}(\bar{\mathbf{U}}_l^k)$$

Take arbitrary (non-zero) positive numbers  $\epsilon, \delta$ . Take  $\lambda$  such that  $\lambda \geq \frac{2}{\delta} \sum_{l=0}^\infty \mu_l^2$ . Define

$$\Phi_{\max} = \max_{\|\mathbf{U} - \tilde{\mathbf{U}}\| \leq \lambda} \Phi(\mathbf{U})$$

Define  $l_0, k$  such that  $\sum_{l=k}^\infty \mu_l^2 < \epsilon\delta/8$  and

$$\forall l > l_0; h_n \sum_{t=0}^{l-1} \mu_{t+k}^2 e^{-\frac{2}{n^2} \sum_{s=t+1}^{l-1} \frac{\mu_{s+k}}{1+\mu_{s+k}}} +$$

$$(\lambda + \mu_k \Phi_{\max}) e^{-\frac{2}{n^2} \sum_{s=0}^{l-1} \frac{\mu_{s+k}}{1+\mu_{s+k}}} < \frac{\epsilon}{8}$$

It is simple to see that such a choice exists because of the conditions in part (3). Now, we define two outcomes  $H_1$  and  $H_2$ :

$$H_1 : \forall k \geq 0; \|\mathbf{U}_k - \tilde{\mathbf{U}}\|_{\mathbb{F}}^2 \leq \lambda$$

$$H_2 : \forall l \geq 0; \|\bar{\mathbf{U}}_l^k - \mathbf{U}_{l+k}\| \leq \frac{\epsilon}{4}$$

Notice that from part (1) we have that  $\Pr(H_1^c)$  and  $\Pr(H_2^c)$  are less than  $\delta/2$ . Furthermore, under  $H_1 \cap H_2$  we have that:

$$\begin{aligned} \forall l > l_0; \|\mathbf{U}_{l+k} - \tilde{\mathbf{U}}\|_2^2 &\leq 2(\|\mathbf{U}_{l+k} - \bar{\mathbf{U}}_l^k\|_{\mathbb{F}}^2 + \|\bar{\mathbf{U}}_l^k - \tilde{\mathbf{U}}\|_{\mathbb{F}}^2) \\ &\leq 2\left(\frac{\epsilon}{4} + \frac{\epsilon}{4}\right) = \epsilon \end{aligned}$$

This is because according to part (2),

$$\|\bar{\mathbf{U}}_l^k - \tilde{\mathbf{U}}\|_{\mathbb{F}}^2 \leq 2R(\bar{\mathbf{U}}_l^k, \mu_{l+k}) \leq$$

$$2h_n \sum_{t=0}^{l-1} \mu_{t+k}^2 e^{-\frac{2}{n^2} \sum_{s=t+1}^{l-1} \frac{\mu_{s+k}}{1+\mu_{s+k}}}$$

$$+ 2R(\mathbf{U}_k, \mu_k) e^{-\frac{2}{n^2} \sum_{s=0}^{l-1} \frac{\mu_{s+k}}{1+\mu_{s+k}}} \leq \frac{\epsilon}{4}$$

where we used  $H_1$  to conclude that  $R(\mathbf{U}_k, \mu_k) \leq \lambda + \Phi_{\max} \mu_k$ . We conclude that

$$\Pr(\sup_{l > l_0+k} \|\mathbf{U}_l - \tilde{\mathbf{U}}\|_2^2 > \epsilon) \leq \Pr(H_1^c) + \Pr(H_2^c) \leq \delta$$

which proves part (3).

For part (4), define  $k_r = r^\gamma$ ,  $\lambda_r = r^{-\beta}$ , where  $\gamma = \frac{1-\epsilon}{1-\alpha}$ ,  $\beta < \gamma(2\alpha - 1) - 1$ , and the outcomes:

$$Q_r : \sup_{l \geq 0} \|\mathbf{U}_{l+k_r} - \bar{\mathbf{U}}_l^{k_r}\|_{\mathbb{F}}^2 > \lambda_r.$$

By part (1), we have that

$$\sum_{r=1}^\infty \Pr(Q_r) < \infty.$$

Hence by Borel-Cantelli lemma,  $Q_{r_0}^c, Q_{r_0+1}^c, Q_{r_0+2}^c, \dots$  simultaneously hold for some  $r_0$  with probability 1. For simplicity and without loss of generality, we assume that  $r_0 = 0$  as it does not affect the asymptotic rate. Then for any  $r > 0$ , we have that

$$\sup_{l \geq 0} \|\mathbf{U}_{l+k_r} - \bar{\mathbf{U}}_l^{k_r}\|_{\mathbb{F}}^2 \leq \lambda_r$$

In particular,

$$\|\mathbf{U}_{k_{r+1}} - \bar{\mathbf{U}}_{l_r}^{k_r}\|_{\mathbb{F}}^2 \leq \lambda_r$$

where  $l_r = k_{r+1} - k_r$ . From part (2b), we conclude that

$$\|\bar{\mathbf{U}}_{l_r}^{k_r} - \tilde{\mathbf{U}}\|_{\mathbb{F}}^2 \leq A \sum_{t=0}^{l_r-1} \frac{1}{(t+k_r)^{2\alpha}} e^{-2a \sum_{s=t+1}^{l_r-1} \frac{1}{(s+k_r)^\alpha}}$$

$$+ \|\mathbf{U}_{k_r} - \tilde{\mathbf{U}}\|_{\mathbb{F}}^2 e^{-2a \sum_{s=0}^{l_r-1} \frac{1}{(s+k_r)^\alpha}}$$

where we introduce  $\mu_1 = bn^2$  and  $A = 4an^4b^2$  for simplicity. This leads to

$$\|\mathbf{U}_{k_{r+1}} - \tilde{\mathbf{U}}\|_{\mathbb{F}}^2 \leq 2\lambda_r + A \sum_{t=0}^{l_r-1} \frac{1}{(t+k_r)^{2\alpha}} e^{-2b \sum_{s=t+1}^{l_r-1} \frac{1}{(s+k_r)^\alpha}}$$

$$+ 2\|\mathbf{U}_{k_r} - \tilde{\mathbf{U}}\|_{\mathbb{F}}^2 e^{-2b \sum_{s=0}^{l_r-1} \frac{1}{(s+k_r)^\alpha}}$$

$$\leq L e^{Lk_r^{1-\alpha} - Lk_{r+1}^{1-\alpha}} \|\mathbf{U}_{k_r} - \tilde{\mathbf{U}}\|_{\mathbb{F}}^2 +$$

$$2\lambda_r + A \sum_{t=0}^{l_r} \frac{1}{(t+k_r)^{2\alpha}} e^{L(k_r+t)^{1-\alpha} - Lk_{r+1}^{1-\alpha}}$$

385  
386  
387  
388  
389  
390  
391  
392  
393  
394  
395  
396  
397  
398  
399  
400  
401  
402  
403  
404  
405  
406  
407  
408  
409  
410  
411  
412  
413  
414  
415  
416  
417  
418  
419  
420  
421  
422  
423  
424  
425  
426  
427  
428  
429  
430  
431  
432  
433  
434  
435  
436  
437  
438  
439

where  $L$  denotes "some suitable constant" which may vary in difference occurrences. Notice that

$$\begin{aligned} \sum_{t=0}^{l_r} \frac{1}{(t+k_r)^{2\alpha}} e^{L(k_r+t)^{1-\alpha} - Lk_{r+1}^{1-\alpha}} &= \sum_{t=k_r}^{k_{r+1}} \frac{1}{t^{2\alpha}} e^{Lt^{1-\alpha} - Lk_{r+1}^{1-\alpha}} \\ &\leq L \sum_{t=k_r}^{k_{r+1} - Lk_{r+1}^\alpha(1+\rho \log(k_{r+1}))} \frac{1}{t^{2\alpha}} e^{-L\rho \log(k_{r+1})} \\ &\quad + \sum_{t=k_{r+1} - Lk_{r+1}^\alpha(1+L\rho \log(k_{r+1}))}^{k_{r+1}} \frac{1}{t^{2\alpha}} \\ &\leq L \left( \frac{1}{(k_{r+1} - Lk_{r+1}^\alpha(1+\rho \log(k_{r+1})))^{2\alpha-1}} - \frac{1}{k_{r+1}^{2\alpha-1}} \right) \\ &\quad + L \frac{e^{-L\rho \log(k_{r+1})}}{k_r^{2\alpha-1}} \leq \frac{L \log(k_{r+1})}{k_{r+1}^\alpha} \leq \frac{L \log r}{r^{\gamma\alpha}} < \frac{L}{r^\beta} \end{aligned}$$

where  $\rho$  is a sufficiently large constant and we use the fact that  $\gamma\alpha > \gamma(2\alpha - 1) - 1 > \beta$ . Moreover,

$$k_r^{1-\alpha} - k_{r+1}^{1-\alpha} = r^{\gamma(1-\alpha)} - (r+1)^{\gamma(1-\alpha)} \leq -Lr^{\gamma(1-\alpha)-1}$$

We conclude that

$$\|\mathbf{U}_{k_{r+1}} - \tilde{\mathbf{U}}\|_{\mathbb{F}}^2 \leq \frac{L}{r^\beta} + Le^{-Lr^{\gamma(1-\alpha)-1}} \|\mathbf{U}_{k_r} - \tilde{\mathbf{U}}\|_{\mathbb{F}}^2$$

which leads to

$$\begin{aligned} \|\mathbf{U}_{k_r} - \tilde{\mathbf{U}}\|_{\mathbb{F}}^2 &\leq \\ &L \left( \sum_{s=1}^{r-1} \frac{1}{s^\beta} e^{-L \sum_{t=s+1}^{r-1} t^{\gamma(1-\alpha)-1}} + e^{-L \sum_{t=0}^{r-1} t^{\gamma(1-\alpha)-1}} \right) \\ &\leq L \left( \sum_{s=1}^{r-1} \frac{1}{s^\beta} e^{L(s^{\gamma(1-\alpha)} - r^{\gamma(1-\alpha)})} + e^{-Lr^{\gamma(1-\alpha)}} \right) \end{aligned}$$

With a similar approach to the above, we observe that

$$\|\mathbf{U}_{k_r} - \tilde{\mathbf{U}}\|_{\mathbb{F}}^2 \leq \frac{L \log r}{r^{\beta-\frac{\epsilon}{2}}} \leq \frac{L}{r^{\beta-\epsilon}}$$

Take  $k_r < l \leq k_{r+1}$ . We observe that

$$\begin{aligned} \|\mathbf{U}_l - \tilde{\mathbf{U}}\|_2^2 &\leq 2(\|\mathbf{U}_{k_r} - \tilde{\mathbf{U}}\|_2^2 + \|\mathbf{U}_{k_r} - \mathbf{U}_l\|_2^2) \\ &\leq 2\lambda_r + \frac{L}{r^{\beta-\epsilon}} \leq \frac{L}{r^{\beta-\epsilon}} \leq \frac{L}{l^{\frac{\beta-\epsilon}{\gamma}}} \end{aligned}$$

By taking  $\beta = \gamma(2\alpha - 1) - 1$ , we obtain part (4).  $\square$
